# Supplementary material
Source: publisher figshare collection journal article supplement (https://brill.figshare.com/articles/dataset/_/5802894)
Supplement: Supplementary file 1 [file 1]

# **New species, taxonomy, phylogeny, and distribution of the tropical tribe Bothriomirini (Insecta: Heteroptera: Miridae: Cylapinae)**

**Anna A. Namyatova, Peter Contos and Gerasimos Cassis**

School of Biological, Earth and Environmental Sciences, University of New South Wales, Sydney, NSW, Australia, 2052

## **Supplementary information 2.** All localities for bothriomirines used for the Figure 23.

| <b>N</b> | <b>Locality</b>                                                                                  | <b>Latitude</b> | <b>Longitude</b> | <b>Region</b> | <b>Date</b>             | <b>Species</b>                                          | <b>Collecting method</b> | <b>Reference</b>          |
|----------|--------------------------------------------------------------------------------------------------|-----------------|------------------|---------------|-------------------------|---------------------------------------------------------|--------------------------|---------------------------|
| 1        | TANZANIA; East Usambara Amani, 1000m                                                             | -5.09164        | 38.63            | Afrotropical  | 01 Feb 1977             | <i>Afrobothriomiris tanzanicus</i><br>Gorczyca, 2000    |                          | Gorczyca, 2000            |
| 2        | INDIA, Tenmalai, Travancore, 152-243m; India                                                     | 9.31308         | 77.502392        | Oriental      | 11-17 Oct 1938          | <i>Dashymenia tenmalai</i> Wolski<br>and Gorczyca, 2012 |                          | Wolski and Gorczyca, 2012 |
| 3        | INDIA, Chozhiyakodu                                                                              | 8.851457        | 77.034738        | Oriental      | 15 Nov 2014             | <i>Dashymenia tenmalai</i> Wolski<br>and Gorczyca, 2012 |                          | Yeshwanth et al., 2016    |
| 4        | THAILAND, Doi Suthep-Pui, natn. Park, Konthathan, waterfall area, 600 m                          | 18.823915       | 98.887498        | Oriental      | 20-27 Oct 1979          | <i>Bothriomiris dissimulans</i><br>Walker, 1873         |                          | Wolski and Gorczyca, 2012 |
| 5        | THAILAND, Surat Thani, Ban Ta Khun District, Khao Sok NP, Klong Morg Unit 87 m (285 ft) Pongphan | 8.89542         | 98.65042         | Oriental      | 07 Oct 2008-14 Oct 2008 | <i>Dashymenia</i> sp.                                   |                          | specimen                  |
| 6        | THAILAND, Surat Thani, Khao Sok NP, Headquarter                                                  | 8.9149333       | 93.5301667       | Oriental      | 16-23 Dec 2008          | <i>Dashymenia</i> sp.                                   |                          | specimen                  |
| 7        | THAILAND, Phitsanulok, Thung Salaeng Luang NP Dry evergreen                                      | 16.83695        | 101.8757         | Oriental      | 11-18 Aug 2006          | <i>Bothriomiris</i> sp.                                 |                          | specimen                  |
| 8        | THAILAND, Phetchabun, Lom Sak District, Khao Kho NP,                                             | 16.87622        | 101.13462        | Oriental      | 19 Oct 2006-26 Oct 2006 | <i>Dashymenia</i> sp.                                   |                          | specimen                  |

|    |                                                                                      |            |            |          |                                   |                                                                                                    |            |                                                                                                                      |
|----|--------------------------------------------------------------------------------------|------------|------------|----------|-----------------------------------|----------------------------------------------------------------------------------------------------|------------|----------------------------------------------------------------------------------------------------------------------|
|    | Nursery [520 m (1706 ft)<br>Somchai Chatchumnan and Sa-ink Singtong                  |            |            |          |                                   |                                                                                                    |            |                                                                                                                      |
| 9  | THAILAND, Kanchanaburi, Khuesan Srinagarindra NP, Chong Kraborg                      | 14.7533333 | 98.8839167 | Oriental | 28 Aug -4 Sep 2008                | <i>Dashymenia</i> sp.                                                                              |            | specimen                                                                                                             |
| 10 | SINGAPORE                                                                            | 1.331202   | 103.833274 | Oriental | No date                           | <i>Bothriomiris dissimulans</i> Walker, 1873                                                       |            | Walker, 1873 (HT locality)                                                                                           |
| 11 | BURMA, Caren Cheba, 900-1100 m                                                       | 19.2166667 | 96.5833333 | Oriental | 05 Dec 1988 (original V XII 1988) | nr <i>Bothriomiris dissimulans</i> Walker, 1873 (see discussion for <i>Bothriomiris lugubris</i> ) |            | Wolski and Gorczyca, 2012                                                                                            |
| 12 | BURMA, Caren Cheba, 900-1100 m                                                       | 19.2166667 | 96.5833333 | Oriental | 05 Dec 1988                       | <i>Dashymenia remus</i> (Distant, 1904)                                                            |            | Wolski and Gorczyca, 2012                                                                                            |
| 13 | BURMA, Karennee                                                                      | 19.24823   | 97.384854  | Oriental | No date                           | <i>Bothriomiris testaceus</i> Distant, 1904                                                        |            | Wolski and Gorczyca, 2012                                                                                            |
| 14 | LAOS. Sayaboury Prov., Sayaboury                                                     | 19.25      | 101.75     | Oriental | 30 Sep 1966                       | <i>Bothriomiris</i> sp.                                                                            | Light trap | Wolski and Gorczyca, 2012                                                                                            |
| 15 | LAOS, Ban Van Eye, Vientian Prov.                                                    | 17.96666   | 102.6      | Oriental | 31 Jul 1965                       | <i>Dashymenia</i> sp.                                                                              | Light trap | specimen                                                                                                             |
| 16 | MYANMAR, Malon                                                                       | 12.407533  | 98.80132   | Oriental | 08 Sep 1987                       | <i>Dashymenia croesus</i> (Distant, 1904)                                                          |            | Wolski and Gorczyca, 2012                                                                                            |
| 17 | MALAYSIA, Perak                                                                      | 4.488209   | 100.923981 | Oriental | No date                           | <i>Bothriomiris dissimulans</i> Walker, 1873                                                       |            | Kirkaldy, 1902 (locality for the types of <i>Bothriomiris marmoratus</i> , junior synonym of <i>B. dissimulans</i> ) |
| 18 | MALAYSIA, Perak                                                                      | 4.488209   | 100.923981 | Oriental | No date                           | <i>Dashymeniella tibialis</i> Poppius, 1914                                                        |            | Poppius, 1914                                                                                                        |
| 19 | MALAYSIA, Pulo Penang,                                                               | 5.37127    | 100.243171 | Oriental | Feb 1989                          | <i>Dashymenia convexicollis</i> Poppius, 1910                                                      |            | Poppius, 1910                                                                                                        |
| 20 | MALAYSIA, Bettotan nr Sandakan                                                       | 5.822649   | 117.878314 | Oriental | 24 Aug 1937                       | <i>Bothriomiris dissimulans</i> Walker, 1873                                                       |            | Wolski and Gorczyca, 2012                                                                                            |
| 21 | MALAYSIA, Matang Road in Sarawak                                                     | 1.315131   | 110.817174 | Oriental | 06 Dec 1909                       | <i>Bothriomiris ornatus</i> Bergroth, 1910                                                         |            | Wolski and Gorczyca, 2012                                                                                            |
| 22 | MALAYSIA, Gunong Mulu Nat. Park; Gonong Api Melinau Gorge; Sarawak; limestone forest | 3.949936   | 114.783257 | Oriental | 01 Mar – 8 Jun, 1978              | <i>Dashymenia cognata</i> Wolski and Gorczyca, 2012                                                |            | Wolski and Gorczyca, 2012                                                                                            |
| 23 | MALAYSIA, Sabah: Sipitang, Mendolong                                                 | 4.916971   | 115.766632 | Oriental | 10 Mar 1989                       | <i>Dashymenia conspersa</i> Wolski and Gorczyca, 2012                                              |            | Wolski and Gorczyca, 2012                                                                                            |

|    |                                                                         |             |            |          |                         |                                                                                                                      |              |                           |
|----|-------------------------------------------------------------------------|-------------|------------|----------|-------------------------|----------------------------------------------------------------------------------------------------------------------|--------------|---------------------------|
| 24 | MALAYSIA, Genting Highlands                                             | 3.417836    | 101.788943 | Oriental | Jul 1981                | <i>Dashymenia webbi</i> Wolski and Gorczyca, 2012                                                                    |              | Wolski and Gorczyca, 2012 |
| 25 | MALAYSIA, 19km N of Kalabakan, North Borneo                             | 4.584319    | 117.486425 | Oriental | 16 Oct 1962; 04 Nov1962 | <i>Dashymenia jaydeni</i> sp. nov.                                                                                   | Light trap   | specimen                  |
| 26 | MALAYSIA, Borneo: Sabah, Mt. Kinabalu, trails around Park               | 6.073945    | 116.55745  | Oriental | 06 May1970              | <i>Dashymenia</i> sp.                                                                                                |              | specimen                  |
| 27 | MALAYSIA, Foot of Mt Dulit, Junction of Rivers Tinjar & Lejok, Malaysia | 3.351309    | 114.164603 | Oriental | 22 Sep 1932             | <i>Dashymeniella spatulatiformis</i> Wolski and Gorczyca, 2012                                                       |              | Wolski and Gorczyca, 2012 |
| 28 | MALAYSIA, Sabah: Tawau: Maliau Basin                                    | 4.848313    | 116.839214 | Oriental | 6-11 Dec 2007           | <i>Dashymeniella viklundi</i> Wolski and Gorczyca, 2012                                                              | Malaise trap | Wolski and Gorczyca, 2012 |
| 29 | MALAYSIA, Sabah: Tawau: Maliau Basin: Riparian Nature Trail             | 4.743528    | 116.9725   | Oriental | 6-11 Dec 2007           | <i>Leprocapsus scutellaris</i> Poppis, 1914                                                                          |              | Wolski, 2012              |
| 30 | MALAYSIA, Sarawak: Gunong Mulu Nat. Park; Long Pala base camp           | 3.949786    | 114.783107 | Oriental | Feb-Jul 1978            | <i>Leprocapsus scutellaris</i> Poppis, 1914                                                                          |              | Wolski, 2012              |
| 31 | BRUNEI, Kuala Belalong,                                                 | 4.547348    | 115.157534 | Oriental | Oct 1992                | <i>Dashymenia colubrina</i> Wolski and Gorczyca, 2012                                                                | Malaise trap | Wolski and Gorczyca, 2012 |
| 32 | BRUNEI, Ulu Temburong ridge                                             | 4.480877    | 115.185408 | Oriental | No date                 | <i>Dashymeniella spatulatiformis</i> Wolski and Gorczyca, 2012                                                       |              | Wolski and Gorczyca, 2012 |
| 33 | BRUNEI, Ulu Temburong ridge                                             | 4.480877    | 115.185408 | Oriental | No date                 | <i>Dashymeniella ulu</i> Wolski and Gorczyca 2012                                                                    |              | Wolski and Gorczyca, 2012 |
| 34 | BRUNEI, Temburong, Steepslope forest above Kuala Belalong, Brunei       | 4.547053    | 115.157567 | Oriental | 10 Oct 1992             | <i>Dashymeniella spatulatiformis</i> Wolski and Gorczyca, 2012                                                       |              | Wolski and Gorczyca, 2012 |
| 35 | PHILIPPINES, Mt Makiling                                                | 14.136304   | 121.194358 | Oriental | No date                 | <i>Bothriomiris crassicornis</i> (Poppis, 1915)                                                                      |              | Poppis, 1915              |
| 36 | PHILIPPINES, Mt. Apo, Batraeyon, 2438m                                  | 6.973339    | 125.261306 | Oriental | 14 Sep                  | <i>Dashymenia</i> sp.                                                                                                |              | specimen                  |
| 37 | INDONESIA, Blavan, Bondowoso, Java                                      | -8.002491   | 114.164611 | Oriental | Apr-May 1936            | Nr <i>Bothrimiris dissimulatum</i> and/or <i>B. lugubris</i> 1873 (see discussion for <i>Bothriomiris lugubris</i> ) |              | Wolski and Gorczyca, 2012 |
| 38 | INDONESIA, Ijen (Idjen Plateau), Java, Indonesia                        | -8.058      | 101.75     | Oriental | 27 Mar 1938             | <i>Bothriomiris</i> sp.                                                                                              |              | specimen                  |
| 39 | INDONESIA, Banjuwangi, Java                                             | -8.325721   | 114.184381 | Oriental | 1911                    | <i>Dashymenia macgillavri</i> Poppis, 1914                                                                           |              | Poppis, 1914              |
| 40 | INDONESIA, G. Ungaran (Oengaran),                                       | - -7.013534 | 110.438454 | Oriental | Mar 1936                | <i>Dashymeniella</i> sp.                                                                                             |              |                           |

|    |                                                                          |           |            |          |                                                                                                                         |                                                       |                      |                           |
|----|--------------------------------------------------------------------------|-----------|------------|----------|-------------------------------------------------------------------------------------------------------------------------|-------------------------------------------------------|----------------------|---------------------------|
|    | C.O. Jomblang , Java                                                     |           |            |          |                                                                                                                         |                                                       |                      |                           |
| 41 | INDONESIA, Gunung Halimun, National Park, Cikaniki, West Java, Indonesia | -6.690918 | 106.457989 | Oriental | 9-16 May 2000; 25 Jul-01 Aug 2000                                                                                       | <i>Leprocapsus javanensis</i> sp. nov.                | Malaise trap         | specimen                  |
| 42 | INDONESIA, Sulawesi-Utara, Dumoga Bone N.P.                              | 0.560556  | 123.68     | Oriental | June 1985                                                                                                               | <i>Bothriomiris dissimulans</i> Walker, 1873;         |                      | Wolski and Gorczyca, 2012 |
| 43 |                                                                          | 0.560556  | 123.68     |          | January 1985                                                                                                            | <i>Bothriomiris sulawesicus</i> Gorczyca, 2005        | On fallen tree       | Wolski and Gorczyca, 2012 |
| 44 |                                                                          | 0.560556  | 123.68     |          | 15 May-29 Jun 1985                                                                                                      | <i>Dashymenia kerzhneri</i> Gorczyca and Wolski, 2006 | Malaise trap         | Wolski and Gorczyca, 2012 |
| 45 | INDONESIA, Plot A, Sulawesi-Utara, Dumoga Bone N.P.                      | 0.560556  | 123.68     | Oriental | 3-10 Apr 1985                                                                                                           | <i>Bothriomiris sulawesicus</i> Gorczyca, 2005        |                      | Wolski and Gorczyca, 2012 |
| 46 |                                                                          | 0.560556  | 0.560556   |          | 20-27 Mar 1985                                                                                                          | <i>Dashymenia kotejai</i> Wolski and Gorczyca, 2006   |                      | Wolski and Gorczyca, 2012 |
| 47 | INDONESIA, Plot A, Sulawesi-Utara, Dumoga Bone N.P.                      | 0.560556  | 123.68     | Oriental | 2-9 Oct 1985                                                                                                            | <i>Dashymenia kerzhneri</i> Gorczyca and Wolski, 2006 | Flight interception  | Wolski and Gorczyca, 2012 |
| 48 | INDONESIA, “Edwards” Taraut, 680m                                        | 0.560556  | 123.68     | Oriental | 26 Apr -07 Jun 1985                                                                                                     | <i>Bothriomiris dissimulans</i> Walker, 1873          | Malaise trap on tree | Wolski and Gorczyca, 2012 |
| 49 | INDONESIA, “Edwards” Taraut, 680m                                        | 0.560556  | 123.68     | Oriental | 26 Apr -07 Jun 1985                                                                                                     | <i>Dashymenia kerzhneri</i> Gorczyca and Wolski, 2006 | Malaise trap         | Wolski and Gorczyca, 2012 |
| 50 | INDONESIA, Toraut, Sulawesi-Utara, Dumoga Bone N.P.; In forest           | 0.560556  | 123.68     | Oriental | 17-24 Jul 1985                                                                                                          | <i>Bothriomiris sulawesicus</i> Gorczyca, 2005        | Malaise trap         | Wolski and Gorczyca, 2012 |
| 51 | INDONESIA, Toraut, Sulawesi-Utara, Dumoga Bone N.P.; In forest           | 0.560556  | 123.68     | Oriental | 10-17 Jul 1985; 09-16 May 1985; 7-14 Aug 1985; 14-21 Aug 1985; 21-28 Aug 1985; 27 Nov - 4 Dec 1985; 30 Oct 06 Nov 1985; | <i>Dashymenia kerzhneri</i> Gorczyca and Wolski, 2006 | Malaise trap         | Wolski and Gorczyca, 2012 |
| 52 | INDONESIA, Toraut, Sulawesi-Utara, Dumoga Bone N.P.; In forest           | 0.560556  | 123.68     | Oriental | 09-16 May 1985                                                                                                          | <i>Dashymenia kotejai</i> Wolski and Gorczyca, 2006   | Malaise trap         | Wolski and Gorczyca, 2012 |
| 53 | INDONESIA, “Edwards” Camp. Lowland forest 664m,                          | 0.560556  | 123.68     | Oriental | 08 Aug –Sep 1985                                                                                                        | <i>Bothriomiris sulawesicus</i> Gorczyca, 2005        |                      | Wolski and Gorczyca, 2012 |

|    |                                                                                                                            |           |            |            |                             |                                                          |              |                              |
|----|----------------------------------------------------------------------------------------------------------------------------|-----------|------------|------------|-----------------------------|----------------------------------------------------------|--------------|------------------------------|
|    | Sulawesi-Utara,<br>Dumoga Bone N.P.                                                                                        |           |            |            |                             |                                                          |              |                              |
| 54 | INDONESIA, Blue<br>Zone Rothamstead 2<br>[handwritten]; Lowland<br>forest ca 200 m,<br>Sulawesi-Utara,<br>Dumoga Bone N.P. | 0.560556  | 123.68     | Oriental   | Mid of Jun – 10 Jul<br>1985 | <i>Bothriomiris sulawesicus</i><br>Gorczyca, 2005        | Malaise trap | Wolski and Gorczyca,<br>2012 |
| 55 | INDONESIA, Hog's<br>Back Camp, Eastern<br>Dumoga-bone National<br>Park; lowland forest,<br>492 m                           | 0.560556  | 123.68     | Oriental   | 21 Jul 1985                 | <i>Bothriomiris sulawesicus</i><br>Gorczyca, 2005        | Malaise trap | Wolski and Gorczyca,<br>2012 |
| 6  | INDONESIA, Tray 26,<br>Fog 1, Plot A; 1230 m;<br>Sulawesi-Utara,<br>Dumoga Bone N.P.                                       | 0.560556  | 123.68     | Oriental   | Feb 1985                    | <i>Bothriomiris sulawesicus</i><br>Gorczyca, 2005        |              | Wolski and Gorczyca,<br>2012 |
| 57 | INDONESIA, Danau<br>Mooat, 1300m,<br>Sulawesi-Utara,<br>Dumoga Bone N.P.                                                   | 0.560556  | 123.68     | Oriental   | May 1985                    | <i>Dashymenia kerzhneri</i><br>Gorczyca and Wolski, 2006 | Malaise trap | Wolski and Gorczyca,<br>2012 |
| 58 | INDONESIA, Si-<br>Rambe, Sumatra,                                                                                          | -5.359743 | 105.255745 | Oriental   | Dec 1890- Mar<br>1891       | <i>Dashymeniella tibialis</i> Poppius,<br>1914           |              | Wolski and Gorczyca,<br>2012 |
| 59 |                                                                                                                            | -5.359743 | 105.255745 |            | Dec 1890- Mar<br>1891       | <i>Leprocapsus scutellaris</i><br>Poppius, 1914          |              | Wolski, 2012                 |
| 60 | INDONESIA, Bukit<br>Kaba NP., Bengkulu<br>Prov., Sumatra, 1000-<br>1500m                                                   | 3.483333  | 102.6      |            | 30 Jan-03 Feb<br>2000       | <i>Leprocapsus scutellaris</i><br>Poppius, 1914          |              | Wolski, 2012                 |
| 61 | INDONESIA, Lake<br>Paso, Pendolo, Sulawesi                                                                                 | -2.090155 | 120.680512 | Oriental   | 21 Aug 1990                 | <i>Leprocapsus schuhi</i> Wolski,<br>2012                |              | Wolski, 2012                 |
| 62 | INDONESIA, Borme,<br>Jayawijaya-Prov.,<br>1300m, Papua                                                                     | -4.233836 | 140.309204 | Australian | 13-18 Jul 1992              | <i>Leprocapsus irianjayensis</i><br>Wolski, 2012         |              | Wolski, 2012                 |
| 63 | INDONESIA, Waigeo<br>Isl., Kabul Bay,<br>Waiyay, Irian Jaya,<br>Sorong Prov.                                               | -0.184572 | 131.034831 | Australian | 14-15 Nov 1996              | <i>Leprocapsus parvus</i> Wolski,<br>2012                |              | Wolski, 2012                 |
| 64 | PAPUA NEW<br>GUINEA, Chimbu<br>Prov., Bismarck Range,<br>southeast slope of Mt                                             | -5.792618 | 145.029506 | Australian | 19 Apr 1989                 | <i>Leprocapsus</i> sp.                                   |              | Specimen                     |

|    |                                                                                  |             |             |            |                                       |                                          |                  |                              |
|----|----------------------------------------------------------------------------------|-------------|-------------|------------|---------------------------------------|------------------------------------------|------------------|------------------------------|
|    | Wilhelm, 2.8 km NW of Kelsugl, 2900m                                             |             |             |            |                                       |                                          |                  |                              |
| 65 | PAPUA NEW GUINEA, Karimuri, S of Goroka, PNG                                     | -6.495927   | 144.822068  | Australian | 03 Jun 1961; 13 Jul 1963; 17 Jul 1955 | <i>Bothriomiris lorenzatoae</i> sp. nov. |                  | Carvalho and Lorenzato, 1978 |
| 66 | PAPUA NEW GUINEA, Camp Bishop, 12km uk Kait Road, New Ireland                    | -4.455572   | 152.684043  | Australian | 16 Jul 1956                           | <i>Bothriomiris lorenzatoae</i> sp. nov. |                  | Carvalho and Lorenzato, 1978 |
| 67 | PAPUA NEW GUINEA, Gazelle Pen., Kerawt                                           | -4.639284   | 152.017025  | Australian | 02 Sep 1955                           | <i>Bothriomiris lorenzatoae</i> sp. nov. |                  | Carvalho and Lorenzato, 1978 |
| 68 | PAPUA NEW GUINEA, Flyr, Kiunga, Papua                                            | -6.119855   | 141.297326  | Australian | Aug 1969                              | <i>Bothriomiris lorenzatoae</i> sp. nov. |                  | Carvalho and Lorenzato, 1978 |
| 69 | PAPUA NEW GUINEA, Madang Prov., 4.3 km NW of Awar-Bok Road                       | -5.228564   | 106.457989  | Australian | 23 Apr 1989                           | <i>Bothriomiris</i> sp.                  |                  | specimen                     |
| 70 | SOLOMON ISLANDS, Auki, 2-20m                                                     | -8.765637   | 160.696446  | Australian | 21 Sep 1957                           | <i>Bothriomiris</i> sp.                  |                  | specimen                     |
| 71 | SOLOMON ISLANDS, Dala, Malaita,                                                  | -8.589397   | 160.6856    | Australian | 03 Jul 1964                           | <i>Bothriomiris</i> sp.                  | Malaise trap     | specimen                     |
| 72 | AUSTRALIA, 10km SE El Arish, Laceys Creek nr Mission Beach, QLD; 40m; rainforest | -17.86067   | 146.08632   | Australian | 23 Jul 1982 – 05 Aug 1982             | <i>Bothriomiris ater</i> sp. nov.        |                  | specimen                     |
| 73 | AUSTRALIA, Bartle Frere, W base, QLD, 50m                                        | -17.38333   | 145.7913889 | Australian | 25 Nov 1994 – 10 Jan 1995             | <i>Bothriomiris ater</i> sp. nov.        | Intercept trap   | specimen                     |
| 74 | AUSTRALIA, Cardwell Ra, Mt Macalister, QLD; rainforest                           | -18.3044444 | 145.9422222 | Australian | 18 Dec 1986-14 Jan 1987               | <i>Bothriomiris ater</i> sp. nov.        | Intercept trap   | specimen                     |
| 75 | AUSTRALIA, Mossman Bluff Track, 5-10km W Mossman(Site1), QLD; 250m               | -16.46667   | 145.3667    | Australian | 20 Dec 1989 – 15 Jan 1990             | <i>Bothriomiris ater</i> sp. nov.        | Flight intercept | specimen                     |
| 76 | AUSTRALIA, Mt Graham, 8km N Abergowrie, QLD; 600-700m; rainforest                | -18.4       | 145.8667    | Australian | 26-30 Dec 1986                        | <i>Bothriomiris ater</i> sp. nov.        |                  | specimen                     |
| 77 | AUSTRALIA, W base                                                                | -17.38333   | 145.7913889 | Australian | 10 Jan 1995 – 31                      | <i>Bothriomiris ater</i> sp. nov.        | Intercept trap   | specimen                     |

|    |                                                                                                                   |             |             |            |                           |                                                           |                                                                                              |                                                   |
|----|-------------------------------------------------------------------------------------------------------------------|-------------|-------------|------------|---------------------------|-----------------------------------------------------------|----------------------------------------------------------------------------------------------|---------------------------------------------------|
|    | of Mt Bartle Frere,<br>QLD; 700m                                                                                  |             |             |            | Mar 1995                  |                                                           |                                                                                              |                                                   |
| 78 | AUSTRALIA, Windsor<br>Tableland, 5.7km past<br>barracks, QLD; rainforst                                           | -16.07      | 145.3333333 | Australian | 08 Feb 1988               | <i>Bothriomiris ater</i> sp. nov.                         | pyrethrum                                                                                    | specimen                                          |
| 79 | AUSTRALIA, Windsor<br>Tableland, site 1, QLD;<br>1140m                                                            | -16.2569444 | 145.0211111 | Australian | 10 Jan 1989               | <i>Bothriomiris ater</i> sp. nov.                         | pyrethrum                                                                                    | specimen                                          |
| 80 | AUSTRALIA, Cairns<br>District, QLD                                                                                | -16.92304   | 145.76625   | Australian | No date                   | <i>Bothriomiris ater</i> sp. nov.                         |                                                                                              | specimen                                          |
| 81 | CHINA, Hainan Is., Tai-<br>pin-ts ucn, Lan-ka-<br>heung, Lai-mo-ling (Mt.<br>Bange), Klung-shan<br>District       | 19.099717   | 109.735567  | Oriental   | 17-18 May 1937            | <i>Bothriomiris dissimulans</i><br>Walker, 1873           |                                                                                              | Wolski and Gorczyca,<br>2012                      |
| 82 | THAILAND, Fuhosho<br>(Wu-ch'eng), Thailand                                                                        | 24.951572   | 121.466019  | Oriental   | Jul1909                   | <i>Bothriomiris lugubris</i> (Poppius,<br>1915)           |                                                                                              | Wolski and Gorczyca,<br>2012                      |
| 83 | THAILAND, Kosempo<br>(Kaohsiung),                                                                                 | 22.627382   | 120.300452  | Oriental   | 07.04.1912                | <i>Bothriomiris lugubris</i> (Poppius,<br>1915)           |                                                                                              | Wolski and Gorczyca,<br>2012                      |
| 84 | THAILAND, Thailand:<br>Nakhon Ratchasima:<br>Sakaerat Silvicultural<br>Research Station                           | 14.4636389  | 001.8709167 | Oriental   | 25.09.2013                | <i>Bothriomiris artchawakomi</i>                          |                                                                                              | Wolski and Yasunaga,<br>2016                      |
| 85 | THAILAND, Satun<br>Province, Thale Ban<br>National Park                                                           | 6.7         | 100.1666667 | Oriental   | 14-16 Dec 1911            | <i>Bothriomiris gorczycai</i>                             |                                                                                              | Wolski and Yasunaga,<br>2016                      |
| 86 | TAIWAN, Bonshoryo—<br>Distr., Sokutsu,<br>Thailand (Kaohsiung<br>County; Chishan<br>(Banshoryo (Kizan),<br>Kizan) | 22.8933     | 120.4697    | Oriental   | 07.08.1912                | <i>Bothriomiris lugubris</i> (Poppius,<br>1915)           |                                                                                              | Wolski and Gorczyca,<br>2012                      |
| 87 | TAIWAN, Fenchihu,<br>Nantow, Hsien, 1400m                                                                         | 23.504936   | 120.69439   | Oriental   | 07-08 Jul 1965            | <i>Bothriomiris capillosus</i><br>Yasunaga, 2000          |                                                                                              | Yasunaga, 2000                                    |
| 88 | JAPAN, Shirahama,<br>Iriomote<br>Is., Ryukyus                                                                     | 24.354371   | 123.75386   | Oriental   | 07 Jun 1998               | <i>Bothriomiris capillosus</i><br>Yasunaga, 2000          | on heavily<br>fungous-covered<br>rotten<br>logs in dark, humid<br>subtropical rain<br>forest | Yasunaga, 2000;<br>Yasunaga and<br>Miyamoto, 2006 |
| 89 | JAPAN, Ryukyus,<br>Ishigaki Is., Mt.<br>Nosokodake                                                                | 24.489149   | 124.248682  | Oriental   | 22.07.2002;<br>29.09.2002 | <i>Bothriomiris ernsti</i> Yasunaga<br>and Miyamoto, 2006 | on heavily<br>fungous-covered<br>rotten<br>logs in dark, humid                               | Yasunaga and<br>Miyamoto, 2006                    |

|     |                                                          |           |            |            |                                       |                                           |                                                                                                                                                                                          |                |
|-----|----------------------------------------------------------|-----------|------------|------------|---------------------------------------|-------------------------------------------|------------------------------------------------------------------------------------------------------------------------------------------------------------------------------------------|----------------|
|     |                                                          |           |            |            |                                       |                                           | subtropical rain forest                                                                                                                                                                  |                |
| 90  | JAPAN, Mengawa, Ohtoh Vil., Wakayama Pref.               | 33.687924 | 135.592539 | Palaeartic | 02.07.1998                            | <i>Bothriomiris gotohi</i> Yasunaga, 2000 | Both adults and nymphs of this cypeline are found to inhabit rotten logs with polyporaceous fungi under dark, humid, evergreen broad-leaved forests, and rapidly sprint away when chased | Yasunaga, 2000 |
| 91  | JAPAN, Irukawa, Sado Is., Niigata Pref.                  | 38.078331 | 138.345485 | Palaeartic | 21.07.1970                            | <i>Bothriomiris gotohi</i> Yasunaga, 2000 |                                                                                                                                                                                          | Yasunaga, 2000 |
| 92  | JAPAN, Hachijo Is., Tokyo                                | 33.105334 | 139.805366 | Palaeartic | 08.08.1948                            | <i>Bothriomiris gotohi</i> Yasunaga, 2000 |                                                                                                                                                                                          | Yasunaga, 2000 |
| 93  | JAPAN, Mt. Nishitanzawa, Kanagawa Pref.                  | 35.480655 | 139.158273 | Palaeartic | 08.1978                               | <i>Bothriomiris gotohi</i> Yasunaga, 2000 |                                                                                                                                                                                          | Yasunaga, 2000 |
| 94  | JAPAN, Miyazumakyo, Yokkaichi C., Mie Pref.              | 34.96684  | 136.595384 | Palaeartic | 01.09.1987                            | <i>Bothriomiris gotohi</i> Yasunaga, 2000 |                                                                                                                                                                                          | Yasunaga, 2000 |
| 95  | JAPAN, Mie Univ. Exp. Forest, Mie Pref.,                 | 34.743554 | 136.527659 | Palaeartic | 10-11.09.1957                         | <i>Bothriomiris gotohi</i> Yasunaga, 2000 |                                                                                                                                                                                          | Yasunaga, 2000 |
| 96  | JAPAN, Mt. Gomadan, Wakayama Pref.,                      | 34.057865 | 135.567565 | Palaeartic | 26.07.1955                            | <i>Bothriomiris gotohi</i> Yasunaga, 2000 |                                                                                                                                                                                          | Yasunaga, 2000 |
| 97  | JAPAN, Mikawa Vil., Wakayama Pref.,                      | 33.891399 | 135.46324  | Palaeartic | 12.08.1952; 13-14.07.1998; 11.07.1998 | <i>Bothriomiris gotohi</i> Yasunaga, 2000 |                                                                                                                                                                                          | Yasunaga, 2000 |
| 98  | JAPAN, Shikoku: Motoyama, Kochi Pref.                    | 33.752833 | 133.582501 | Palaeartic | 22.08.1998                            | <i>Bothriomiris gotohi</i> Yasunaga, 2000 |                                                                                                                                                                                          | Yasunaga, 2000 |
| 99  | JAPAN, Kuroson, Kochi Pref.                              | 33.128123 | 132.676807 | Palaeartic | 27.08.1954                            | <i>Bothriomiris gotohi</i> Yasunaga, 2000 |                                                                                                                                                                                          | Yasunaga, 2000 |
| 100 | JAPAN, Mount Fukumi, Ehime Prefecture                    | 33.525195 | 132.701575 | Palaeartic | 20.09.1970                            | <i>Bothriomiris gotohi</i> Yasunaga, 2000 |                                                                                                                                                                                          | Yasunaga, 2000 |
| 101 | JAPAN, Mt. Ichibusa, Kumamoto Pref.                      | 32.312656 | 131.09983  | Palaeartic | 02.08.1974                            | <i>Bothriomiris gotohi</i> Yasunaga, 2000 |                                                                                                                                                                                          | Yasunaga, 2000 |
| 102 | JAPAN, Mt. Osuzu, Miyazaki Pref.                         | 32.300069 | 131.424656 | Palaeartic | 22.08.1999                            | <i>Bothriomiris gotohi</i> Yasunaga, 2000 |                                                                                                                                                                                          | Yasunaga, 2000 |
| 103 | JAPAN, Hiji-Hiji Waterfalls, Kunigami Vil., Okinawa Is., | 26.720482 | 128.179693 | Oriental   | 22.10.1987                            | <i>Bothriomiris gotohi</i> Yasunaga, 2000 |                                                                                                                                                                                          | Yasunaga, 2000 |



|     |                                                                      |           |            |            |            |                                                              |  |                                |
|-----|----------------------------------------------------------------------|-----------|------------|------------|------------|--------------------------------------------------------------|--|--------------------------------|
| 104 | JAPAN, Benoki-dam,<br>Kunigami Vil., Okinawa<br>Is.                  | 26.78817  | 128.25636  | Palearctic | 17.06.1999 | <i>Bothriomiris gotohi</i> Yasunaga,<br>2000                 |  | Yasunaga, 2000                 |
| 105 | JAPAN, Ohkawa<br>Timber Road,<br>Yakushima Island,<br>Kagoshima Pref | 30.346135 | 130.531188 | Palearctic | 08.08.2002 | <i>Bothriomiris yakushima</i><br>Yasunaga and Miyamoto, 2006 |  | Yasunaga and<br>Miyamoto, 2006 |
